# Supplementary material for: Synthesis and Properties of the Gallium-Containing Ruddlesden-Popper Oxides with High-Entropy B-Site Arrangement
Source: MDPI journal article supplement (doi:10.3390/ma15186500), 2022-09-19
Supplement: s1 [file s1]

Supplementary Materials

# Synthesis and Properties of the Gallium-Containing Ruddlesden-Popper Oxides with High-Entropy B-Site Arrangement

Juliusz Dąbrowa <sup>1,\*</sup>, Jan Adamczyk <sup>1</sup>, Anna Stępień <sup>2,3</sup>, Marek Zajusz <sup>1</sup>, Karolina Bar <sup>1</sup>, Katarzyna Berent <sup>4</sup> and Konrad Świerczek <sup>2,3</sup>

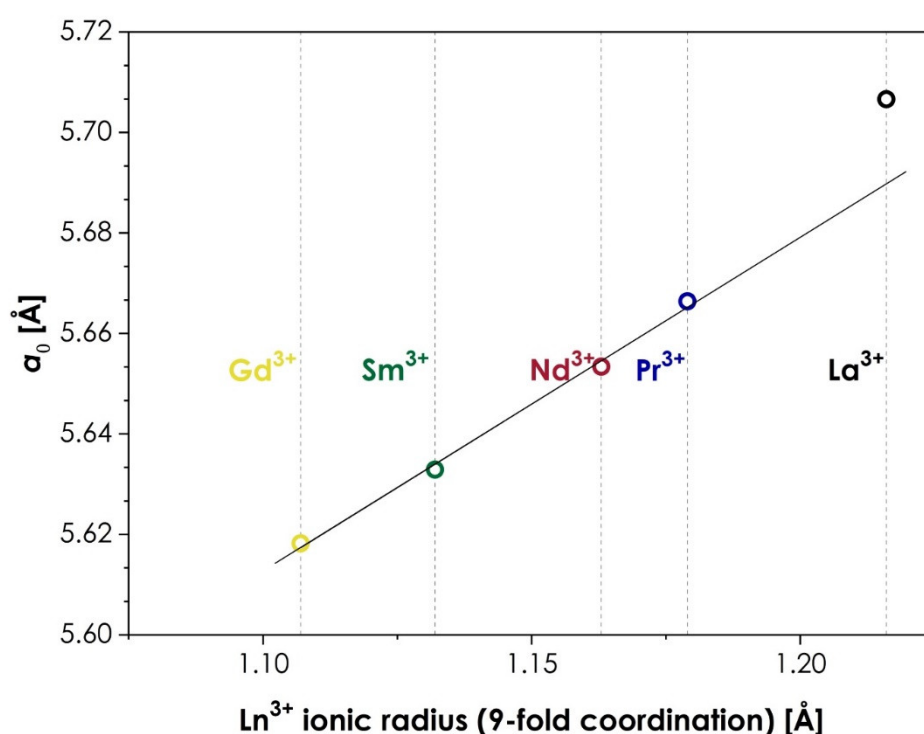

**Figure S1.** The dependence between the normalized, quasi-cubic lattice parameter  $a_0$  and the ionic radii of the  $\text{Ln}^{3+}$  ions for the  $\text{LnSr}(\text{Co,Fe,Ga,Mn,Ni})\text{O}_4$  ( $\text{Ln} = \text{La, Pr, Nd, Sm, or Gd}$ ) series. The linear regression line based on the Gd-, Sm-, Nd-, and Pr-based compositions is extrapolated on the value of ionic radius corresponding to  $\text{La}^{3+}$ .

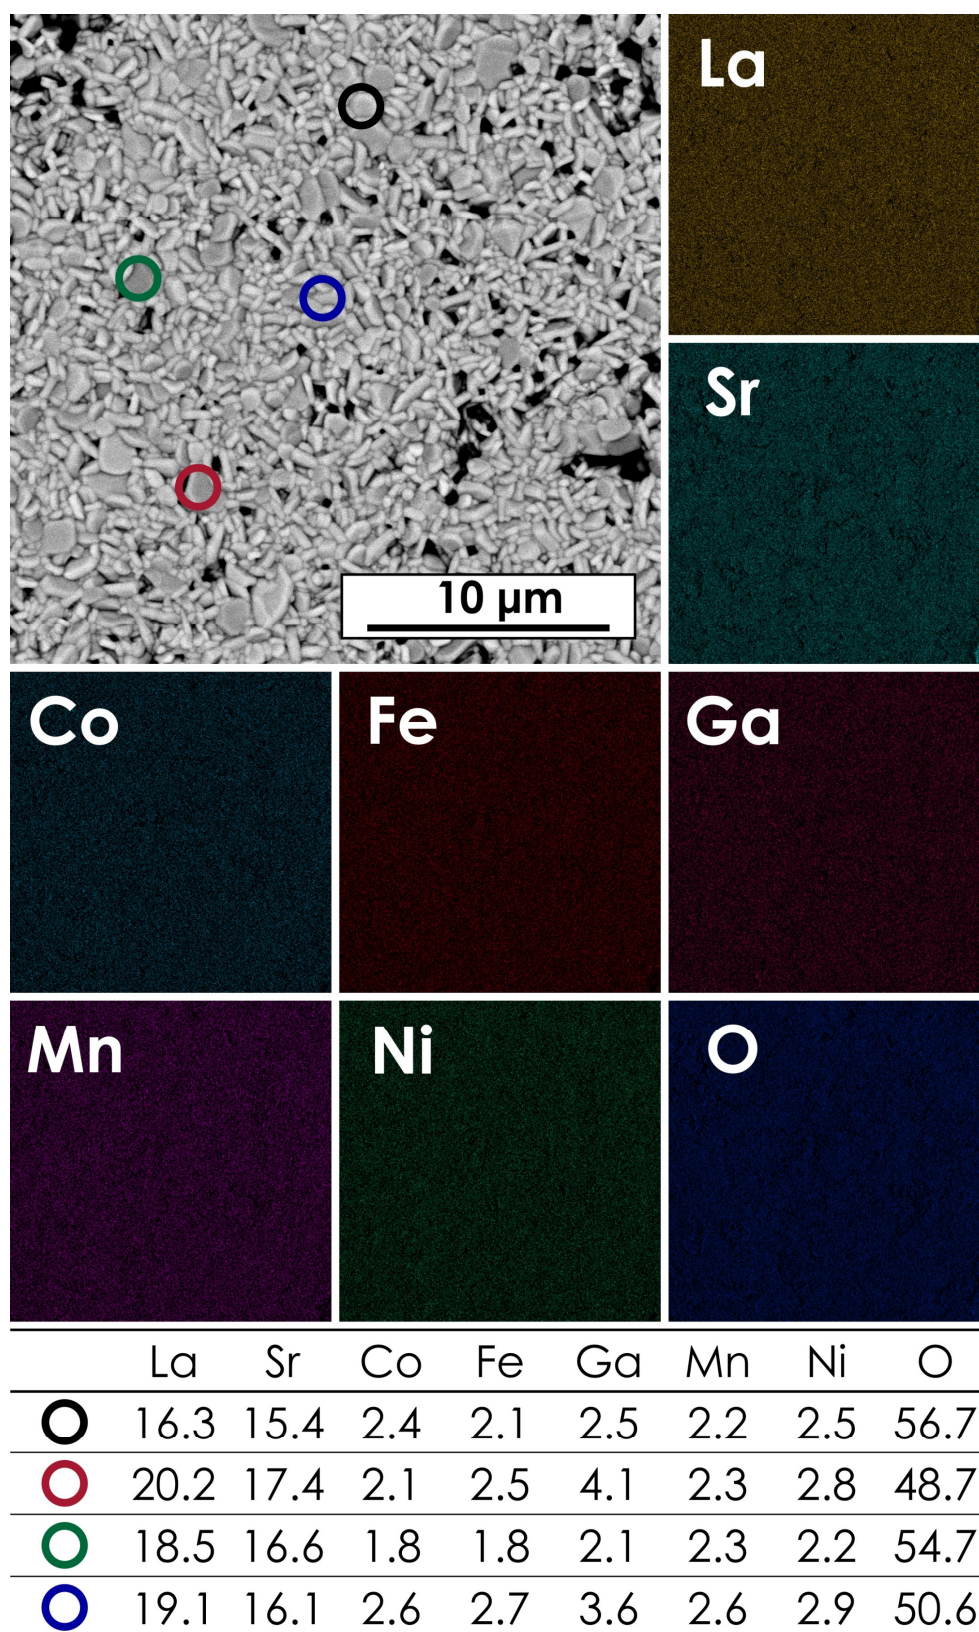

**Figure S2.** The results of EDS mapping and point analysis for the  $\text{LaSr}(\text{Co,Fe,Ga,Mn,Ni})\text{O}_4$  pellet sintered at 1200 °C for 20 h.



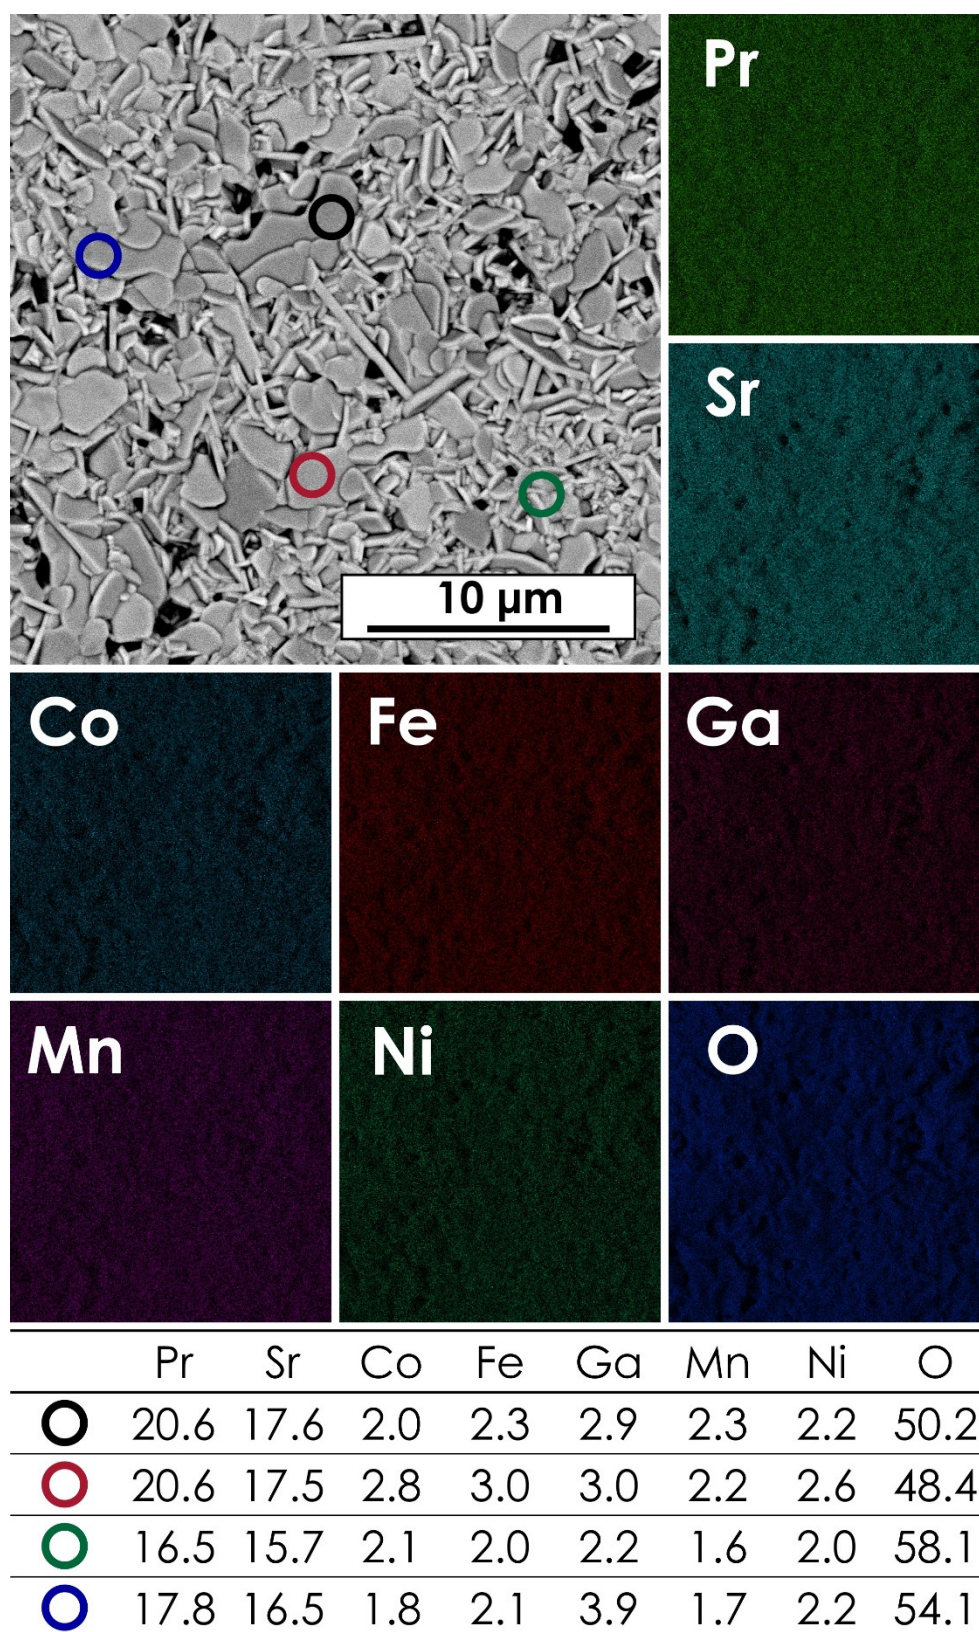

**Figure S3.** The results of EDS mapping and point analysis for the  $\text{PrSr}(\text{Co,Fe,Ga,Mn,Ni})\text{O}_4$  pellet sintered at 1200 °C for 20 h.



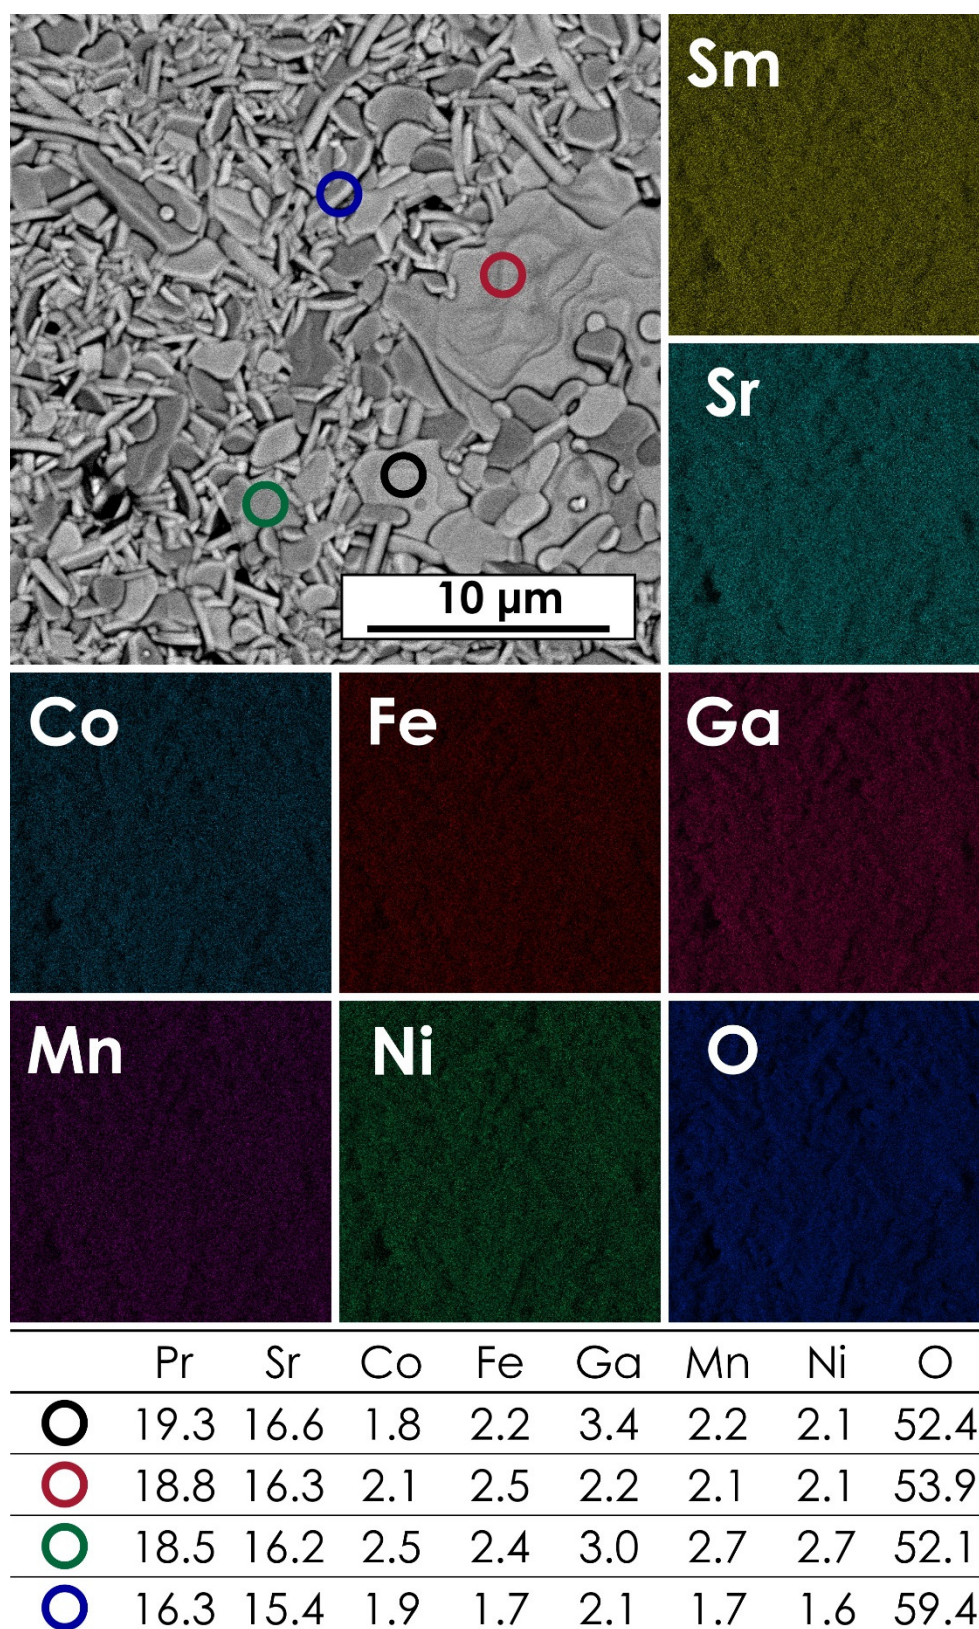

**Figure S4.** The results of EDS mapping and point analysis for the  $\text{SmSr}(\text{Co,Fe,Ga,Mn,Ni})\text{O}_4$  pellet sintered at 1200 °C for 20 h.



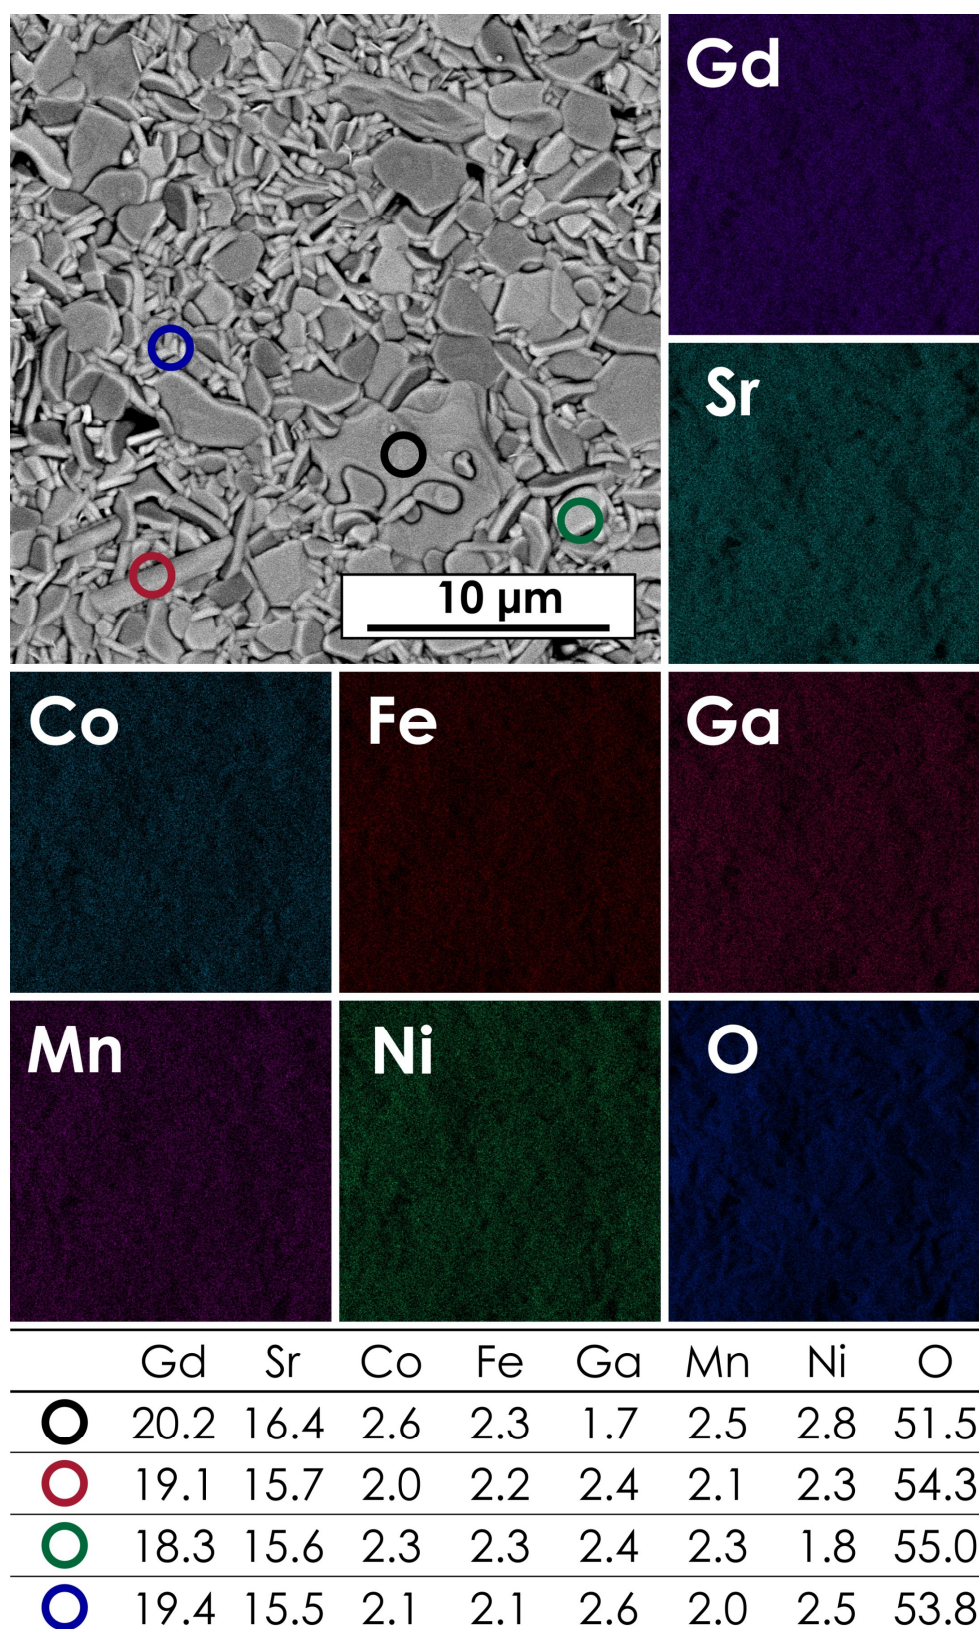

**Figure S5.** The results of EDS mapping and point analysis for the  $\text{GdSr}(\text{Co,Fe,Ga,Mn,Ni})\text{O}_4$  pellet sintered at 1200 °C for 20 h.



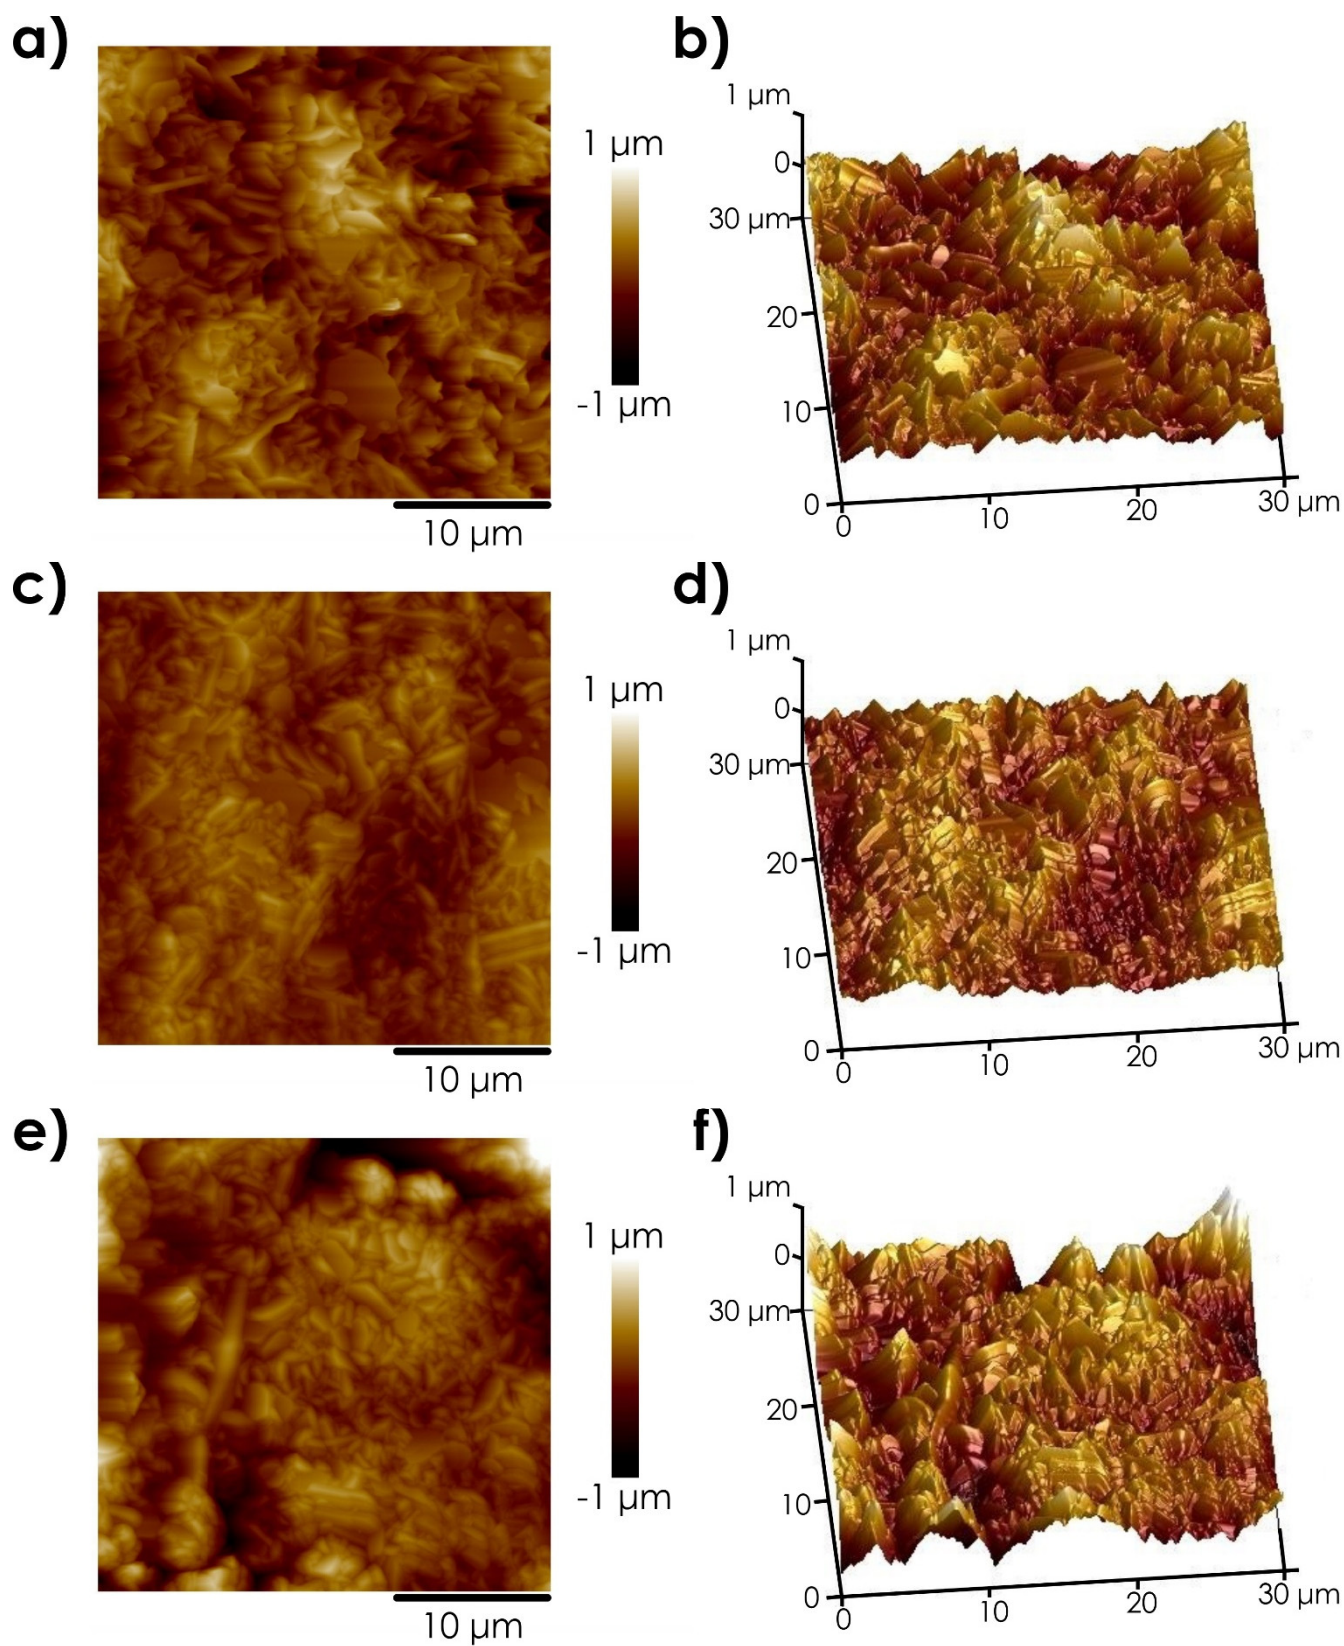

**Figure S6.** The results of the AFM mapping (tapping mode): (a) 2D micrograph of the PrSr(Co,Fe,Ga,Mn,Ni)O<sub>4</sub> pellet; (b) 3D micrograph of the PrSr(Co,Fe,Ga,Mn,Ni)O<sub>4</sub> pellet; (c) 2D micrograph of the NdSr(Co,Fe,Ga,Mn,Ni)O<sub>4</sub> pellet; (d) 3D micrograph of the NdSr(Co,Fe,Ga,Mn,Ni)O<sub>4</sub> pellet; (e) 2D micrograph of the SmSr(Co,Fe,Ga,Mn,Ni)O<sub>4</sub> pellet; (f) 3D micrograph of the SmSr(Co,Fe,Ga,Mn,Ni)O<sub>4</sub> pellet.

**Table S1.** The results of the iodometric titration measurements conducted for the  $\text{LnSr}(\text{Co,Fe,Ga,Mn,Ni})\text{O}_{4+\delta}$  (Ln = La, Pr, Nd, Sm, or Gd) series.

| Composition                                             | Powder mass[g] | Volume of titrant [ml] | Oxygen content | Oxygen non-stoichiometry | Average oxygen non-stoichiometry | Deviation |
|---------------------------------------------------------|----------------|------------------------|----------------|--------------------------|----------------------------------|-----------|
| $\text{LaSr}(\text{Co,Fe,Ga,Mn,Ni})\text{O}_{4+\delta}$ | 0.0508         | 12.017                 | 4.006          | 0.006                    | 0.006                            | 0.004     |
|                                                         | 0.0513         | 12.017                 | 4.002          | 0.002                    |                                  |           |
|                                                         | 0.0513         | 12.217                 | 4.009          | 0.009                    |                                  |           |
| $\text{PrSr}(\text{Co,Fe,Ga,Mn,Ni})\text{O}_{4+\delta}$ | 0.0507         | 12.017                 | 4.009          | 0.009                    | 0.015                            | 0.006     |
|                                                         | 0.0508         | 12.217                 | 4.015          | 0.015                    |                                  |           |
|                                                         | 0.0509         | 12.417                 | 4.021          | 0.021                    |                                  |           |
| $\text{NdSr}(\text{Co,Fe,Ga,Mn,Ni})\text{O}_{4+\delta}$ | 0.0507         | 11.817                 | 4.006          | 0.006                    | 0.008                            | 0.005     |
|                                                         | 0.0506         | 12.017                 | 4.014          | 0.014                    |                                  |           |
|                                                         | 0.0509         | 11.817                 | 4.004          | 0.004                    |                                  |           |
| $\text{SmSr}(\text{Co,Fe,Ga,Mn,Ni})\text{O}_{4+\delta}$ | 0.0510         | 11.817                 | 4.011          | 0.011                    | 0.013                            | 0.003     |
|                                                         | 0.0508         | 11.817                 | 4.012          | 0.012                    |                                  |           |
|                                                         | 0.0502         | 11.817                 | 4.017          | 0.017                    |                                  |           |
| $\text{GdSr}(\text{Co,Fe,Ga,Mn,Ni})\text{O}_{4+\delta}$ | 0.0501         | 11.617                 | 4.019          | 0.019                    | 0.013                            | 0.006     |
|                                                         | 0.0511         | 11.617                 | 4.011          | 0.011                    |                                  |           |
|                                                         | 0.0514         | 11.617                 | 4.008          | 0.008                    |                                  |           |

**Table S2.** The results of the Rietveld analysis conducted for diffractograms from HT-XRD measurement of  $\text{SmSr}(\text{Co,Fe,Ga,Mn,Ni})\text{O}_{4+\delta}$  (cooling run).

| Temperature [°C] | Space group | $a = b$ [Å] | $c$ [Å] | $V_0$ [Å <sup>3</sup> ] | $a_0$ [Å] | GoF  | Rwp  |
|------------------|-------------|-------------|---------|-------------------------|-----------|------|------|
| 1000             | $I4/mmm$    | 3.8473      | 12.6261 | 186.887                 | 5.7173    | 2.81 | 2.85 |
| 900              | $I4/mmm$    | 3.8421      | 12.5973 | 185.960                 | 5.7079    | 2.87 | 2.90 |
| 800              | $I4/mmm$    | 3.8367      | 12.5670 | 184.991                 | 5.6979    | 2.88 | 2.91 |
| 700              | $I4/mmm$    | 3.8313      | 12.5365 | 184.017                 | 5.6879    | 2.68 | 2.82 |
| 600              | $I4/mmm$    | 3.8264      | 12.5066 | 183.114                 | 5.6786    | 2.44 | 2.69 |
| 500              | $I4/mmm$    | 3.8212      | 12.4775 | 182.195                 | 5.6691    | 2.47 | 2.71 |
| 400              | $I4/mmm$    | 3.8165      | 12.4486 | 181.321                 | 5.6600    | 2.50 | 2.72 |
| 300              | $I4/mmm$    | 3.8120      | 12.4212 | 180.493                 | 5.6514    | 2.88 | 2.92 |
| 200              | $I4/mmm$    | 3.8076      | 12.3940 | 179.683                 | 5.6429    | 3.91 | 3.41 |
| 100              | $I4/mmm$    | 3.8039      | 12.3710 | 179.001                 | 5.6358    | 2.24 | 2.60 |
| 25               | $I4/mmm$    | 3.8012      | 12.3539 | 178.503                 | 5.6305    | 2.03 | 2.48 |

**Table S3.** The results of the Rietveld analysis conducted for diffractograms from HT-XRD measurement of NdSr(Co,Fe,Ga,Mn,Ni)O<sub>4+δ</sub> (cooling run).

| Temperature<br>[°C] | Space<br>group | $a = b$<br>[Å] | $c$<br>[Å] | $V_0$<br>[Å <sup>3</sup> ] | $a_0$<br>[Å] | GoF  | Rwp  |
|---------------------|----------------|----------------|------------|----------------------------|--------------|------|------|
| 1000                | <i>I4/mmm</i>  | 3.8590         | 12.7046    | 189.194                    | 5.7408       | 4.65 | 3.51 |
| 900                 | <i>I4/mmm</i>  | 3.8537         | 12.6757    | 188.250                    | 5.7312       | 4.68 | 3.53 |
| 800                 | <i>I4/mmm</i>  | 3.8485         | 12.6460    | 187.297                    | 5.7215       | 4.77 | 3.56 |
| 700                 | <i>I4/mmm</i>  | 3.8433         | 12.6161    | 186.357                    | 5.7119       | 4.47 | 3.44 |
| 600                 | <i>I4/mmm</i>  | 3.8381         | 12.5843    | 185.383                    | 5.7020       | 4.35 | 3.41 |
| 500                 | <i>I4/mmm</i>  | 3.8332         | 12.5542    | 184.465                    | 5.6925       | 4.03 | 3.28 |
| 400                 | <i>I4/mmm</i>  | 3.8284         | 12.5239    | 183.561                    | 5.6832       | 3.97 | 3.25 |
| 300                 | <i>I4/mmm</i>  | 3.8238         | 12.4949    | 182.696                    | 5.6743       | 3.96 | 3.27 |
| 200                 | <i>I4/mmm</i>  | 3.8196         | 12.4675    | 181.890                    | 5.6659       | 3.82 | 3.20 |
| 100                 | <i>I4/mmm</i>  | 3.8154         | 12.4413    | 181.109                    | 5.6578       | 4.98 | 3.68 |
| 25                  | <i>I4/mmm</i>  | 3.8125         | 12.4245    | 180.594                    | 5.6524       | 4.85 | 3.67 |

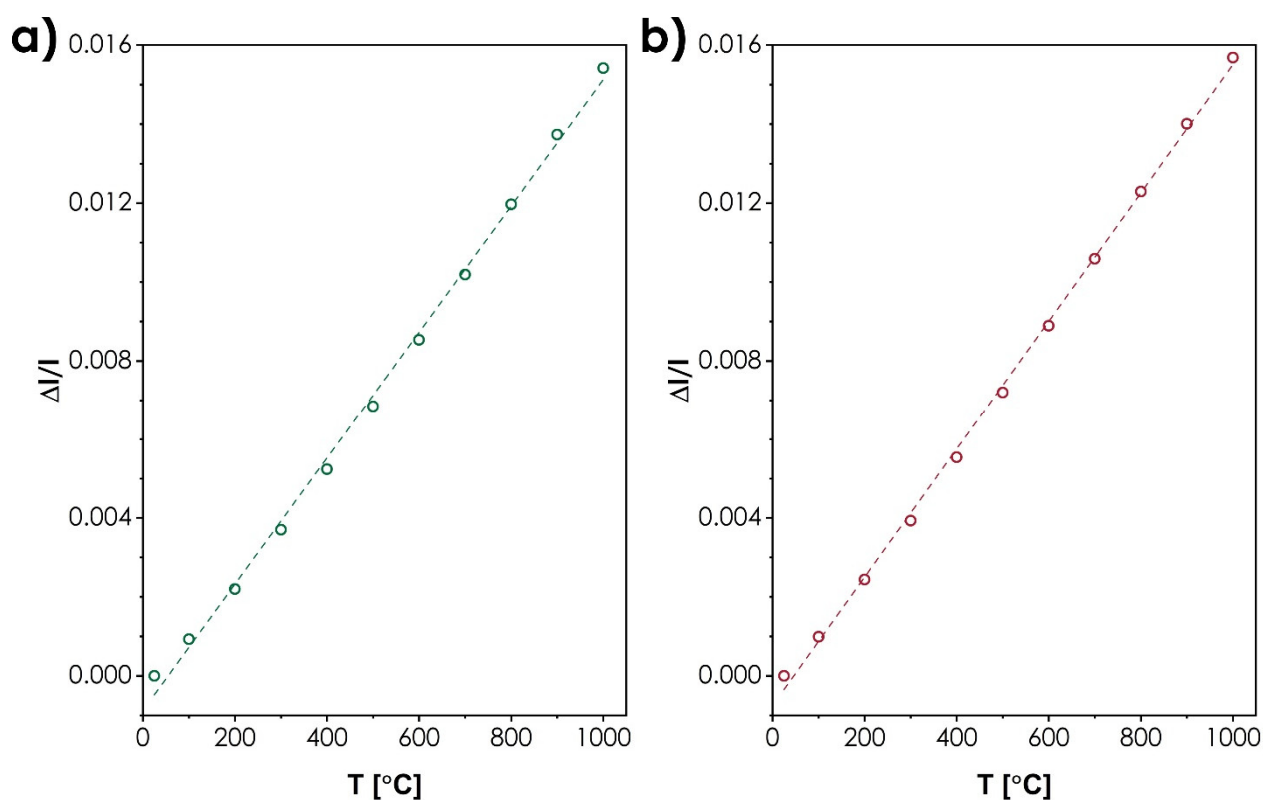

**Figure S7.** Thermal expansion behavior determined from the unit cell expansion during HT-XRD measurement for: (a) SmSr(Co,Fe,Ga,Mn,Ni)O<sub>4+δ</sub>; (b) NdSr(Co,Fe,Ga,Mn,Ni)O<sub>4+δ</sub>.
